# Supplementary material
Source: PubMed Central journal article supplement (PMC7185385)
Supplement: mmc1.pdf [file mmc1.pdf]

# Supplementary Material for An Ensemble Approach to Predicting the Impact of Vaccination on Rotavirus Disease in Niger

Jaewoo Park<sup>\*1</sup>, Joshua Goldstein<sup>2</sup>, Murali Haran<sup>1</sup>, and Matthew Ferrari<sup>3</sup>

<sup>1</sup>Department of Statistics, The Pennsylvania State University, University Park, PA 16802, USA

<sup>2</sup>Social and Data Analytics Laboratory, 900 N Glebe Rd, Virginia Tech, Arlington, VA 22203. USA

<sup>3</sup>Department of Biology, The Pennsylvania State University, University Park, PA 16802. USA

July 15, 2017

1 We provide details below about the five different dynamic models along with information about  
2 computational methods used to perform inference for each of them. In addition, we describe the  
3 implementation of the Bayesian model averaging approach used in the manuscript.

## 4 **A Model Details**

5 The structure of the models is given in Figure 1, which we explain in detail below. Common to  
6 each of the models we describe, we assume a time-varying transmission rate with a period of one year  
7 to account for seasonality,

$$\beta_i(t) = \beta_{0i} \left( 1 + \omega \cos \left( \frac{2\pi t - 52\phi}{52} \right) \right),$$

8 where  $t$  is time in weeks,  $\beta_{0i}$  is the baseline rate for age class  $i$ , and  $\omega$  and  $\phi$  are the amplitude and  
9 offset of the seasonal variation.

10 We also assume the birth rate  $\mu(t)$  varies with time. The mean weekly birthrate is estimated by  
11  $\bar{\mu} = 1/(5 \times 52)$ . The variation in monthly birth rate is shown in Table 1. Finally, for each model we  
12 assume a negative binomial observation process with mean equal to the number of weekly reported  
13 cases and dispersion parameter  $\nu$ .

14 We describe in detail the dynamics of each of the five models outlined in Figure 1. Model A [13, 2]  
15 is an SIRS model in which severe and mild rotavirus are tracked separately. Severe infections have a

---

\*Email addresses: jzp191@psu.edu (J. Park), joshg22@vbi.vt.edu (J. Goldstein), muh10@psu.edu (M. Haran), mjf283@psu.edu (M. Ferrari)

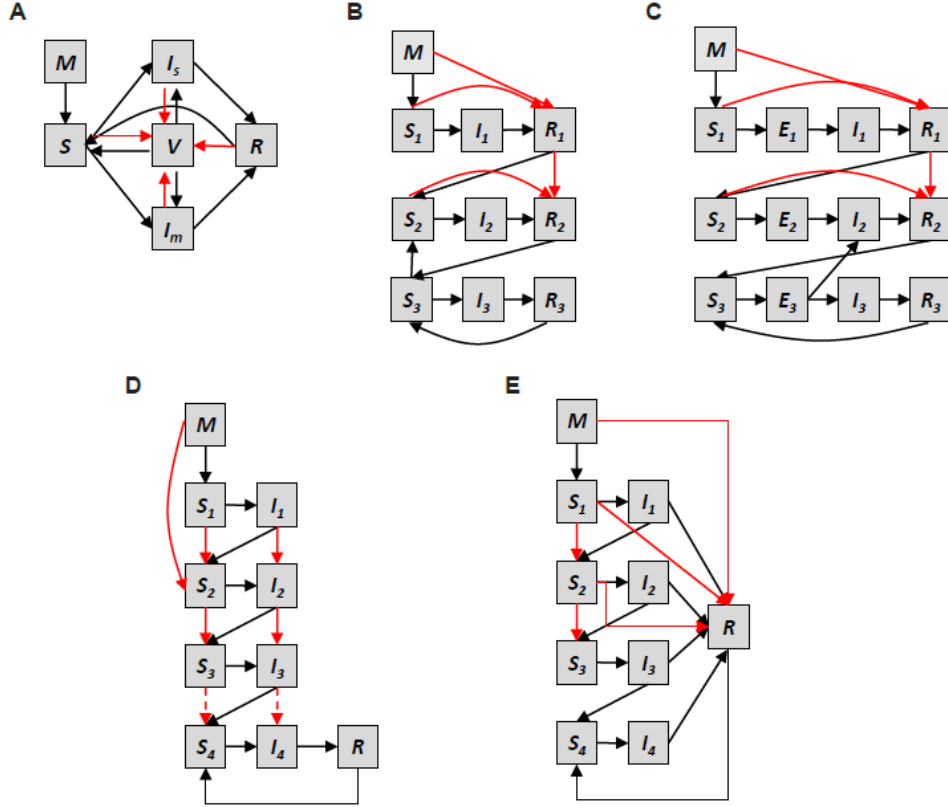

Figure 1: Structure of the compartmental models adapted from [10].

Table 1: Seasonal variation in birth rate in Niger, estimated from 1980-2000 using Demographic and Health Surveys. [5] An amplitude of  $-0.17$  for January tells us the birth rate is 17% below the mean.

| Month     | Jan   | Feb  | Mar  | Apr  | May  | Jun  | Jul   | Aug  | Sep  | Oct  | Nov   | Dec   |
|-----------|-------|------|------|------|------|------|-------|------|------|------|-------|-------|
| Amplitude | -0.17 | 0.01 | 0.03 | 0.25 | 0.12 | 0.03 | -0.01 | 0.09 | 0.01 | 0.13 | -0.31 | -0.17 |

16 longer duration and contribute more to the overall force of infection. Following infection, there is a  
 17 period of temporary immunity that wanes over time. The model is age structured with age groups  
 18 0-1 month, 2-3 months, 4-5 months, 6-11 months, 1 year, and 2-5 years indexed by  $i$ . The differential  
 19 equations describing the model dynamics are:

#### Model A

$$\frac{dM_i}{dt} = \alpha_{i-1}M_{i-1} - \alpha_iM_i + \mu N - \delta M_i \quad (1)$$

$$\frac{dS_i}{dt} = \alpha_{i-1}S_{i-1} - \alpha_iS_i + \delta M_i - \lambda_iS_i + \tau R_i \quad (2)$$

$$\frac{dI_i^{(s)}}{dt} = \alpha_{i-1}I_{i-1}^{(s)} - \alpha_iI_i^{(s)} + \lambda_i^{(s)}S_i - \gamma^{(s)}I_i^{(s)} \quad (3)$$

$$\frac{dI_i^{(m)}}{dt} = \alpha_{i-1}I_{i-1}^{(m)} - \alpha_iI_i^{(m)} + \lambda_i^{(m)}S_i - \gamma^{(m)}I_i^{(m)} \quad (4)$$

20 Movement between age classes occurs at rates dependent on the length of the interval in weeks,  $\alpha =$   
21  $\left\{ \frac{1}{8}, \frac{1}{8}, \frac{1}{8}, \frac{1}{24}, \frac{1}{48}, \frac{1}{144} \right\}$ . The force of infection for age class  $i$  is given by  $\lambda_i = \sum_{j=1}^6 \beta_j(t) C_{ij} \frac{(I_j^{(s)} + 0.5I_j^{(m)})}{N_j}$ ,  
22 assuming that relative infectiousness for mild infections is less than for severe RVGE. Here  $C_{ij}$  repre-  
23 sents the frequency of contact from age class  $i$  onto class  $j$  [6], and satisfies  $f_i C_{ij} = f_j C_{ji}$  where  $f_i$  is  
24 the fraction of the population in class  $i$ . We make the simplifying assumption that contact between  
25 age groups is homogeneous. With the absence of data on rotavirus infections for children over 5 and  
26 adults, we also assume the population of children under 5 is closed and consider child-child trans-  
27 mission only. Infection with rotavirus is typically asymptomatic [10] or unreported for older children  
28 and adults, but could potentially play a role in transmission. The contact matrix is

$$C = \begin{pmatrix} 1 & 1 & 1 & 1 & 1 & 1 \\ 1 & 1 & 1 & 1 & 1 & 1 \\ 1 & 1 & 1 & 1 & 1 & 1 \\ 3 & 3 & 3 & 1 & 1 & 1 \\ 6 & 6 & 6 & 2 & 1 & 1 \\ 18 & 18 & 18 & 6 & 3 & 1 \end{pmatrix}$$

29 .

30 The differences in our age groups means that the contact matrix is not symmetric, for example  
31 we assume the population from 2-5 years is 18 times larger than the population from 0-1 months.

32 For all models, fixed parameters including infection period, immunity period, and exposed period  
33 in the SIR models are estimated from England and Wales data as described in [10]. After a period  
34 of maternal immunity ( $M_i$ ), individuals can be susceptible ( $S_i$ ), infected with either mild ( $I_i^{(m)}$ ) or  
35 severe ( $I_i^{(s)}$ ) rotavirus, or recovered ( $R_i$ ). These represent the number of individuals in each class. In  
36 (1) we see how the number of children protected by maternal immunity change over time. Newborns  
37 are added to this class at rate  $\mu$  and individuals leave this class when maternal immunity wanes with  
38 rate  $\delta$ , where the mean period of maternal immunity is assumed to be 13 weeks ( $\delta = \frac{1}{13}$ ).

39 When maternal immunity wanes children are susceptible to rotavirus infection. In (2), we see that  
40 individuals enter the susceptible class when maternal immunity wanes. They become infected at a  
41 rate given by the force of infection  $\lambda_i$ . After recovery, individuals may reenter the susceptible class  
42 at rate  $\tau$ , where the mean period of immunity following infection is fixed at one year ( $\tau = 1/52$ ).

43 Equation (3) models the change in total infections with severe rotavirus. We assume the proportion  
44 of infections with severe rotavirus is lower than mild by setting  $\lambda_i^{(s)} = 0.24\lambda_i$ . Individuals leave  
45 the infected with severe rotavirus for a mean period of one week ( $\gamma^{(s)} = 1$ ) following which they  
46 are considered to be recovered. Similarly, (4) tracks the total infections with mild rotavirus, with  
47  $\lambda_i^{(m)} = 0.76\lambda_i$  and a mean infectious period of just half a week ( $\gamma^{(m)} = 2$ ).

48 Only a fraction of infections with rotavirus develop RVGE (fixed at 24%), and we assume only  
 49 severe cases are reported, so the expected number of reported cases for age class  $i$  is given by  $\rho\lambda_i^{(s)}S_i$   
 50 where  $\rho$  is the reporting rate. We make the simplifying assumption for all models that  $\rho$  is constant  
 51 across time and does not vary by age group.

52 Model B [11] is an SIRS model allowing for successive infections in which a second, third or  
 53 subsequent infection will have a reduced susceptibility to infection and level of infectiousness. This  
 54 represents partial immunity granted through repeated infections. Only a fraction of individuals in  
 55 the a first or second infectious class are assumed to develop severe RVGE. The model dynamics are  
 56 described by as follows.

### Model B

$$\begin{aligned}
 \frac{dM_i}{dt} &= \alpha_{i-1}M_{i-1} - \alpha_iM_i + \mu N - \delta M_i \\
 \frac{dS_i^{(1)}}{dt} &= \alpha_{i-1}S_{i-1}^{(1)} - \alpha_iS_i^{(1)} + \delta M_i - \lambda_iS_i^{(1)} \\
 \frac{dI_i^{(1)}}{dt} &= \alpha_{i-1}I_{i-1}^{(1)} - \alpha_iI_i^{(1)} + \lambda_iS_i^{(1)} - \gamma^{(1)}I_i^{(1)} \\
 \frac{dR_i^{(1)}}{dt} &= \alpha_{i-1}R_{i-1}^{(1)} - \alpha_iR_i^{(1)} + \gamma^{(1)}I_i^{(1)} - \tau R_i^{(1)} \\
 \frac{dS_i^{(2)}}{dt} &= \alpha_{i-1}S_{i-1}^{(2)} - \alpha_iS_i^{(2)} + \tau R_i^{(1)} - \lambda_i^{(2)}S_i^{(2)} \\
 \frac{dI_i^{(2)}}{dt} &= \alpha_{i-1}I_{i-1}^{(2)} - \alpha_iI_i^{(2)} + \lambda_i^{(2)}S_i^{(2)} - \gamma^{(2)}I_i^{(2)} \\
 \frac{dR_i^{(2)}}{dt} &= \alpha_{i-1}R_{i-1}^{(2)} - \alpha_iR_i^{(2)} + \gamma^{(2)}I_i^{(2)} - \tau R_i^{(2)} \\
 \frac{dS_i^{(3)}}{dt} &= \alpha_{i-1}S_{i-1}^{(3)} - \alpha_iS_i^{(3)} + \tau R_i^{(2)} + \tau R_i^{(3)} - \lambda_i^{(3)}S_i^{(3)} \\
 \frac{dI_i^{(3)}}{dt} &= \alpha_{i-1}I_{i-1}^{(3)} - \alpha_iI_i^{(3)} + \lambda_i^{(3)}S_i^{(3)} - \gamma^{(2)}I_i^{(3)} \\
 \frac{dR_i^{(3)}}{dt} &= \alpha_{i-1}R_{i-1}^{(3)} - \alpha_iR_i^{(3)} + \gamma^{(2)}I_i^{(3)} - \tau R_i^{(3)}
 \end{aligned}$$

57 Here in addition to an initial period of maternal immunity, individuals can be in the suscep-  
 58 tible, infected, or recovered classes for their first ( $S^{(1)}, I^{(1)}, R^{(1)}$ ), second ( $S^{(2)}, I^{(2)}, R^{(2)}$ ), or third  
 59 and subsequent ( $S^{(3)}, I^{(3)}, R^{(3)}$ ) infections. The force of infection for age class  $i$  is given by  $\lambda_i =$   
 60  $\sum_{j=1}^6 \beta_j(t)C_{ij} \frac{(I_j^{(1)} + 0.5I_j^{(2)} + 0.2I_j^{(3)})}{N_j}$ , assuming that relative infectiousness decreases for subsequent  
 61 infections. We assume the relative risk of infection decreases for subsequent infections, setting  
 62  $\lambda_i^{(2)} = 0.62\lambda_i$  and  $\lambda_i^{(3)} = 0.37\lambda_i$  as in [10]. Only 13% of first infections and 3% of second infec-  
 63 tions are assumed to develop severe RVGE, based on data from a Mexico cohort study [16]. So the  
 64 expected number of reported cases for age class  $i$  is given by  $\rho(0.13\lambda_iS_i^{(1)} + 0.03\lambda_i^{(2)}S_i^{(2)})$ . Following

[16], we assume that the mean infectious period for the first infection is one week ( $\gamma^{(1)} = 1$ ) and for subsequent infections is half a week ( $\gamma^{(2)} = 2$ ).

Model C [4] is an SEIRS model, similar to Model B but allowing for an additional exposed or incubation period. Individuals in the exposed class are infected but not yet infectious. The dynamic equations are given by:

### Model C

$$\begin{aligned}
\frac{dM_i}{dt} &= \alpha_{i-1}M_{i-1} - \alpha_iM_i + \mu N - \delta M_i \\
\frac{dS_i^{(1)}}{dt} &= \alpha_{i-1}S_{i-1}^{(1)} - \alpha_iS_i^{(1)} + \delta M_i - \lambda_iS_i^{(1)} \\
\frac{dE_i^{(1)}}{dt} &= \alpha_{i-1}E_{i-1}^{(1)} - \alpha_iE_i^{(1)} + \lambda_iS_i^{(1)} - \xi E_i^{(1)} \\
\frac{dI_i^{(1)}}{dt} &= \alpha_{i-1}I_{i-1}^{(1)} - \alpha_iI_i^{(1)} + \xi E_i^{(1)} - \gamma^{(1)}I_i^{(1)} \\
\frac{dR_i^{(1)}}{dt} &= \alpha_{i-1}R_{i-1}^{(1)} - \alpha_iR_i^{(1)} + \gamma^{(1)}I_i^{(1)} - \tau R_i^{(1)} \\
\frac{dS_i^{(2)}}{dt} &= \alpha_{i-1}S_{i-1}^{(2)} - \alpha_iS_i^{(2)} + \tau R_i^{(1)} - \lambda_i^{(2)}S_i^{(2)} \\
\frac{dE_i^{(2)}}{dt} &= \alpha_{i-1}E_{i-1}^{(2)} - \alpha_iE_i^{(2)} + \lambda_i^{(2)}S_i^{(2)} - \xi E_i^{(2)} \\
\frac{dI_i^{(2)}}{dt} &= \alpha_{i-1}I_{i-1}^{(2)} - \alpha_iI_i^{(2)} + \xi E_i^{(2)} - \gamma^{(2)}I_i^{(2)} \\
\frac{dR_i^{(2)}}{dt} &= \alpha_{i-1}R_{i-1}^{(2)} - \alpha_iR_i^{(2)} + \gamma^{(2)}I_i^{(2)} - \tau R_i^{(2)} \\
\frac{dS_i^{(3)}}{dt} &= \alpha_{i-1}S_{i-1}^{(3)} - \alpha_iS_i^{(3)} + \tau R_i^{(2)} - \lambda_i^{(3)}S_i^{(3)} \\
\frac{dE_i^{(3)}}{dt} &= \alpha_{i-1}E_{i-1}^{(3)} - \alpha_iE_i^{(3)} + \lambda_i^{(3)}S_i^{(3)} - \xi E_i^{(3)} \\
\frac{dI_i^{(3)}}{dt} &= \alpha_{i-1}I_{i-1}^{(3)} - \alpha_iI_i^{(3)} + \xi E_i^{(3)} - \gamma^{(2)}I_i^{(3)} \\
\frac{dR_i^{(3)}}{dt} &= \alpha_{i-1}R_{i-1}^{(3)} - \alpha_iR_i^{(3)} + \gamma^{(2)}I_i^{(3)} - \tau R_i^{(3)}
\end{aligned}$$

The modeling assumptions are the same as Model B but for the addition of an exposed class for the first, second, or subsequent infections ( $E^{(1)}, E^{(2)}, E^{(3)}$ ). We assume a mean exposed period of 1 day ( $\xi = 7$ ).

Model D [15] is an SIS model which also allows for successive infections with different levels of infectiousness, but assumes there is no period of temporary immunity following infection. After four infections individuals are assumed to be fully immune to infection. The dynamics are described as follows.

Model D

$$\begin{aligned}
\frac{dM_i}{dt} &= \alpha_{i-1}M_{i-1} - \alpha_iM_i + \mu N - \delta M_i \\
\frac{dS_i^{(1)}}{dt} &= \alpha_{i-1}S_{i-1}^{(1)} - \alpha_iS_i^{(1)} + \delta M_i - \lambda_iS_i^{(1)} \\
\frac{dI_i^{(1)}}{dt} &= \alpha_{i-1}I_{i-1}^{(1)} - \alpha_iI_i^{(1)} + \lambda_iS_i^{(1)} - \gamma^{(1)}I_i^{(1)} \\
\frac{dS_i^{(2)}}{dt} &= \alpha_{i-1}S_{i-1}^{(2)} - \alpha_iS_i^{(2)} + \gamma^{(1)}I_i^{(1)} - \lambda_i^{(2)}S_i^{(2)} \\
\frac{dI_i^{(2)}}{dt} &= \alpha_{i-1}I_{i-1}^{(2)} - \alpha_iI_i^{(2)} + \lambda_i^{(2)}S_i^{(2)} - \gamma^{(2)}I_i^{(2)} \\
\frac{dS_i^{(3)}}{dt} &= \alpha_{i-1}S_{i-1}^{(3)} - \alpha_iS_i^{(3)} + \gamma^{(2)}I_i^{(2)} - \lambda_i^{(3)}S_i^{(3)} \\
\frac{dI_i^{(3)}}{dt} &= \alpha_{i-1}I_{i-1}^{(3)} - \alpha_iI_i^{(3)} + \lambda_i^{(3)}S_i^{(3)} - \gamma^{(2)}I_i^{(3)} \\
\frac{dS_i^{(4)}}{dt} &= \alpha_{i-1}S_{i-1}^{(4)} - \alpha_iS_i^{(4)} + \gamma^{(2)}I_i^{(3)} - \lambda_i^{(4)}S_i^{(4)} \\
\frac{dI_i^{(4)}}{dt} &= \alpha_{i-1}I_{i-1}^{(4)} - \alpha_iI_i^{(4)} + \lambda_i^{(4)}S_i^{(4)} - \gamma^{(2)}I_i^{(4)}
\end{aligned}$$

77 The force of infection is  $\lambda_i = \sum_{j=1}^6 \frac{\beta_j(t)C_{ij}(I_j^{(1)} + 0.5I_j^{(2)} + 0.2I_j^{(3)} + 0.2I_j^{(4)})}{N_j}$ , assuming that rela-  
78 tive infectiousness decreases for subsequent infections. We also assume the relative risk of infection  
79 decreases for subsequent infections, setting  $\lambda_i^{(2)} = 0.62\lambda_i$  and  $\lambda_i^{(3)} = \lambda_i^{(4)} = 0.37\lambda_i$ . Again, we assume  
80 only 13% of first infections and 3% of second infections are assumed to develop severe RVGE. So the  
81 expected number of reported cases in age group  $i$  is given by  $\rho(0.13\lambda_iS_i^{(1)} + 0.03\lambda_i^{(2)}S_i^{(2)})$ .

82 Finally, Model E [1] is an SIR-SIS hybrid wherein following infection, individuals have a chance  
83 to either return to the susceptible class or gain full immunity. The equations for the dynamics are as  
84 follows.

## Model E

$$\begin{aligned}
\frac{dM_i}{dt} &= \alpha_{i-1}M_{i-1} - \alpha_iM_i + \mu N - \delta M_i \\
\frac{dS_i^{(1)}}{dt} &= \alpha_{i-1}S_{i-1}^{(1)} - \alpha_iS_i^{(1)} + \delta M_i - \lambda_iS_i^{(1)} \\
\frac{dI_i^{(1)}}{dt} &= \alpha_{i-1}I_{i-1}^{(1)} - \alpha_iI_i^{(1)} + \lambda_iS_i^{(1)} - \gamma^{(1)}I_i^{(1)} \\
\frac{dS_i^{(2)}}{dt} &= \alpha_{i-1}S_{i-1}^{(2)} - \alpha_iS_i^{(2)} + \kappa^{(1)}\gamma^{(1)}I_i^{(1)} - \lambda_i^{(2)}S_i^{(2)} \\
\frac{dI_i^{(2)}}{dt} &= \alpha_{i-1}I_{i-1}^{(2)} - \alpha_iI_i^{(2)} + \lambda_i^{(2)}S_i^{(2)} - \gamma^{(2)}I_i^{(2)} \\
\frac{dS_i^{(3)}}{dt} &= \alpha_{i-1}S_{i-1}^{(3)} - \alpha_iS_i^{(3)} + \kappa^{(2)}\gamma^{(2)}I_i^{(2)} - \lambda_i^{(3)}S_i^{(3)} \\
\frac{dI_i^{(3)}}{dt} &= \alpha_{i-1}I_{i-1}^{(3)} - \alpha_iI_i^{(3)} + \lambda_i^{(3)}S_i^{(3)} - \gamma^{(2)}I_i^{(3)} \\
\frac{dS_i^{(4)}}{dt} &= \alpha_{i-1}S_{i-1}^{(4)} - \alpha_iS_i^{(4)} + \kappa^{(3)}\gamma^{(2)}I_i^{(3)} - \lambda_i^{(4)}S_i^{(4)} \\
\frac{dI_i^{(4)}}{dt} &= \alpha_{i-1}I_{i-1}^{(4)} - \alpha_iI_i^{(4)} + \lambda_i^{(4)}S_i^{(4)} - \gamma^{(2)}I_i^{(4)}
\end{aligned}$$

85 The chance of returning to the susceptible class varies by number of previous infections. Following  
86 [1] we fix  $\kappa^{(1)} = 0.62$ ,  $\kappa^{(2)} = 0.65$ ,  $\kappa^{(3)} = 0.85$ . The remaining modeling assumptions are the same as  
87 for models B-D.

### 88 A.1 Computational Details

89 Denote the observed data by  $Y = \{Y_i(t); t \in (1, \dots, t_{obs}), i \in (1, \dots, 6)\}$  where  $Y_i(t)$  is the number  
90 of reported cases in age group  $i$  during week  $t$ . Cases were observed over  $t_{obs} = 118$  weeks. Denote  
91 the number of cases in age group  $i$  during week  $t$  predicted by our models by  $\xi_i(t)$ . For Model A,

$$\xi_i(t) = \rho\lambda_i^{(s)}(t)S_i(t)$$

92 While for models B-E,

$$\xi_i(t) = \rho(0.13\lambda_i(t)S_i^{(1)}(t) + 0.03\lambda_i^{(2)}(t)S_i^{(2)}(t))$$

93 For each model, the periodic solution to the system of ODEs specified above determines the  
94 number of reported cases in age group  $i$  during a given week. Although we assume model dynamics  
95 are periodic, the initial solutions in the numerical solver may not be periodic. Therefore, the numerical  
96 solver uses an iterative approach, integrating the model dynamics forward until a periodic solution  
97 is obtained. To carry this out, we use an iterative numerical solver [9] in the `deSolve` [14] package

98 in R. Solutions have a period of one year; that is, starting from arbitrary initial conditions, we run  
 99 the dynamics forward until our expected number of cases is identical from one 52 week period to the  
 100 next, to within a small tolerance; i.e.

$$\sum_{i=1}^6 \sum_{t=t^*}^{t^*+52} |\xi_i(t) - \xi_i(t-52)| < \epsilon = 0.01$$

101 In practice, numerical integration for 20 years was enough to ensure the periodic solution was reached.  
 102 After reaching a periodic solution, the models are integrated forward an additional 118 weeks to get  
 103 the expected number of reported cases ( $\Xi_i(t); t \in (1, \dots, t_{obs}), i \in (1, \dots, 6)$ ).

104 Define random variables  $N_i(t) \sim NB(\Xi_i(t), \nu)$ . The likelihood is

$$\mathcal{L}(Y|\Theta) = \prod_{i=1}^6 \prod_{t=1}^{t_{obs}} f_{N_i(t)}(Y_i(t))$$

105 The number of observed reported cases is modeled as a Negative Binomial with mean equal to the  
 106 expected number of cases and dispersion parameter  $\nu$ .

107 Inference for our model parameters is done via Markov chain Monte Carlo (MCMC) for models  
 108 A-E. At each step of the Markov chain, new parameters  $\Theta'$  are proposed and the model dynamics are  
 109 integrated forward until the periodic solution  $\Xi_i(t; \Theta')$  is reached in order to calculate  $\mathcal{L}(Y|\Theta')$ . The  
 110 parameters estimated by MCMC are  $\Theta = (\omega, \phi, \nu, \rho, \beta_{0i}; i \in (1, \dots, 6))$ , including seasonal amplitude  
 111  $\omega$ , seasonal phase  $\phi$ , the dispersion  $\nu$  of the Negative Binomial observation process, the reporting rate  
 112  $\rho$ , and the baseline transmission rate for age class  $\beta_{0i}$ .

113 MCMC samples are obtained from the posterior distribution

$$\pi(\omega, \phi, \nu, \rho, \beta_{01}, \dots, \beta_{06}|Y) \propto \mathcal{L}(Y|\omega, \phi, \nu, \rho, \beta_{01}, \dots, \beta_{06})p(\omega)p(\phi)p(\nu)p(\rho) \prod_{i=1}^6 p(\beta_{0i})$$

114 where we take priors  $p(\beta_{0i}) = N(20, 5)$ ,  $p(\omega) = \text{Unif}(0, 1)$ ,  $p(\phi) = \text{Unif}(2, 2\pi + 2)$ ,  $p(\nu) =$   
 115  $\text{Gamma}(0.001, 0.001)$ , and  $p(\rho) = N(0.117, 0.06)$ . The prior of our reporting rate  $\rho$  is centered  
 116 at 11.7%, determined from the estimated reporting rate from the cluster survey (42.9%) and the esti-  
 117 mated proportion of the population under 5 in the four districts that is covered by hospital surveillance  
 118 (27.3%, from 2009 census data). In practice, we find that our estimates are robust to the choice of  
 119 standard deviation of  $p(\rho)$ .

120 Table 2 provides parameter estimates from five different models. Estimates of the strength of  
 121 transmission are similar for models B-D, higher for Model E and significantly lower for Model A.  
 122 The same holds true for the reporting rate (Model A's estimate of the reporting rate is dramatically  
 123 lower, and does not agree with estimates from the cluster survey, evidence that it is performing



Table 2: Posterior means and 95% HPD intervals for estimated parameters

| Model | $\omega$         | $\phi$        | $\nu$         | $\rho$              |
|-------|------------------|---------------|---------------|---------------------|
| A     | 0.50 (0.48,0.51) | 7.4 (7.3,7.5) | 1.5 (1.4,1.5) | 0.039 (0.035,0.044) |
| B     | 0.38 (0.35,0.41) | 7.4 (7.3,7.5) | 2.7 (2.6,2.8) | 0.108 (0.100,0.117) |
| C     | 0.39 (0.33,0.42) | 7.4 (7.3,7.5) | 2.7 (2.3,2.9) | 0.109 (0.101,0.118) |
| D     | 0.31 (0.24,0.36) | 7.1 (7.0,7.2) | 2.6 (2.5,2.7) | 0.109 (0.100,0.119) |
| E     | 0.33 (0.31,0.36) | 7.3 (7.2,7.4) | 5.4 (5.3,5.6) | 0.119 (0.111,0.126) |

124 poorly). Notably, the estimated phase of the transmission  $\phi$  is similar across all models (Table 2).  
 125 For reference, an estimated  $\phi$  of 7.4 corresponds to a peak transmission in early March. This is quite  
 126 close to the period of peak night time brightness in Maradi as measured by satellite imagery [3]. The  
 127 peak night time brightness has been shown to be related to fluctuation of measles cases. Temporal  
 128 change of urban population density and measles transmission are highly correlated, and population  
 129 density can be measured by night time brightness [3].

## 130 A.2 Dynamics Accounting for Vaccination

131 Based on the results of [8] we assume that 63% of vaccinated individuals are successfully seroconvert  
 132 after a single dose. Our models with vaccination allow for the red transitions in Figure 1. For example,  
 133 Model B allows for transitions directly from  $M_{i=1}$  and  $S_{i=1}^{(1)}$  to  $R_{i=2}^{(1)}$  on the first dose, and from  $R_{i=2}^{(1)}$   
 134 and  $S_{i=2}^{(2)}$  to  $R_{i=3}^{(2)}$  on the second dose. The dynamics equations will be modified by the following  
 135 terms:

$$\begin{aligned} \frac{dM_{i=2}}{dt} &= (1 - \sigma\psi)\alpha_1 M_{i=1} + \dots \\ \frac{dS_{i=2}^{(1)}}{dt} &= (1 - \sigma\psi)\alpha_1 S_{i=1}^{(1)} + \dots \\ \frac{dR_{i=2}^{(1)}}{dt} &= (\sigma\psi)\alpha_1 M_{i=1} + (\sigma\psi)\alpha_1 S_{i=1}^{(1)} + \dots \\ \frac{dR_{i=3}^{(1)}}{dt} &= (1 - \sigma\psi)\alpha_2 R_{i=2}^{(1)} + \dots \\ \frac{dS_{i=3}^{(2)}}{dt} &= (1 - \sigma\psi)\alpha_2 S_{i=2}^{(2)} + \dots \\ \frac{dR_{i=3}^{(2)}}{dt} &= (\sigma\psi)\alpha_2 R_{i=2}^{(1)} + (\sigma\psi)\alpha_2 S_{i=2}^{(2)} + \dots \end{aligned}$$

136 Where  $\psi$  is the coverage and  $\sigma = 0.63$  is the rate of seroconversion [8] for low socio-economic  
 137 settings. This means that an individual who is vaccinated with a single dose has a lower risk of  
 138 infection, comparable to the effect of recovering from a natural infection. Vaccination with a second  
 139 dose further reduces risk of infection.

140 In Model A, the risk of infection does not decline with the previous number of infections. Therefore,

141 an additional vaccinated state  $V_i$  is added to the model for age group  $i$ . Two additional input  
 142 parameters are required for the vaccine efficacy against severe and mild RVGE. We assume the  
 143 vaccination happens at 2 months, but the vaccine efficacy is equal to the efficacy predicted under  
 144 models B-E for the two dose strategy,  $\eta^{(s)} = .796$  and  $\eta^{(m)} = .609$ .

$$\begin{aligned}
 \frac{dM_{i=2}}{dt} &= (1 - \psi)\alpha_1 M_{i=1} + \dots \\
 \frac{dS_{i=2}}{dt} &= (1 - \psi)\alpha_1 S_{i=1} + \dots \\
 \frac{dV_{i=2}}{dt} &= (\psi)\alpha_1 M_{i=1} + (\psi)\alpha_1 S_{i=1} + \dots \\
 \frac{dV_{i>2}}{dt} &= \alpha_{i-1} V_{i-1} - \alpha_i V_i - (\tau + \lambda_i^{(s)}(1 - \eta^{(s)}) + \lambda_i^{(m)}(1 - \eta^{(m)}))V_i \\
 \frac{dS_{i>2}}{dt} &= \tau V_i + \dots \\
 \frac{dI_{i>2}^{(s)}}{dt} &= \lambda_i^{(s)}(1 - \eta^{(s)})V_i + \dots \\
 \frac{dI_{i>2}^{(m)}}{dt} &= \lambda_i^{(m)}(1 - \eta^{(m)})V_i + \dots
 \end{aligned}$$

145 Given our vaccination strategy for models B-E, the vaccine efficacy for severe RVGE after two  
 146 doses is 79.6%, in line with efficacy studies of rotavirus vaccines. This is calculated by multiplying the  
 147 proportion of individuals who are successfully immunized twice, once, or zero times by the expected  
 148 reduction in RVGE incidence for each case.

$$VE = 1 - \left[ 0.37^2 \times 1 + 2(0.37)(0.63) \times \left( 0.62 \frac{0.03}{0.13} \right) + 0.63^2 \times \left( 0.37 \frac{0}{0.13} \right) \right] = 79.6\%. \quad (5)$$

149 We assume following [16] that 47% of first infections and 25% of second infections and 32% of third  
 150 infections are assumed to develop any RVGE (mild RVGE is unreported). Therefore the vaccine  
 151 efficacy for all RVGE is

$$VE = 1 - \left[ 0.37^2 \times 1 + 2(0.37)(0.63) \times \left( 0.62 \frac{0.25}{0.47} \right) + 0.63^2 \times \left( 0.37 \frac{0.32}{0.47} \right) \right] = 60.9\%.$$

152 In practice, first model parameters  $\Theta$  are estimated via MCMC for the models without vaccination.  
 153 Using the fitted model, the dynamics are then integrated forward at the posterior mean of  $\Theta$  until the  
 154 periodic solution has been reached. Then, the dynamics are modified to allow for transitions between  
 155 compartments by vaccination.

### 156 **A.2.1 Calculating the Direct Effect of Vaccination**

157 When the vaccine is introduced in the population it leads to decreased transmission, which in turn  
158 leads to a reduced force of infection. The direct effect (DE) of vaccination is the expected reduction  
159 in cases for vaccinated individuals that is not due to the reduction in force of infection. On the other  
160 hand, the indirect effect (IE) of vaccination is the expected reduction in cases for both vaccinated  
161 and unvaccinated individuals due to the reduction in force of infection. The total effect (TE) of  
162 vaccination includes both DE and IE.

163 Define  $S^*$  to be the updated number of susceptibles after the vaccine has been introduced. Our  
164 models assume successive infections except for model A which has 0 weight. If the vaccination has  
165 been introduced for a long time (long enough to include all age classes) then any  $S^{(1)}$  in the age class  
166 would be one who was vaccinated but failed to seroconvert. Therefore,  $S_{i>1}^{*(1)} = (1 - \sigma\psi)S_{i>1}^{(1)}$ , and a  
167 reduced amount of  $(\sigma\psi)S_{i>1}^{(1)}$  is moved to  $S_{i>1}^{(2)}$ . This same logic would follow for those leaving  $S^{(2)}$   
168 and entering  $S^{(3)}$  due to vaccination. Therefore,  $S_{i>1}^{*(2)} = (\sigma\psi)S_{i>1}^{(1)} + (1 - \sigma\psi)S_{i>1}^{(2)}$ .

169 We estimate DE by using  $S^{(1)}$ ,  $S^{(2)}$ , and  $\lambda$  from dynamic equations without vaccination. Then  
170 the reduced burden is calculated  $\rho\lambda_i(0.03S_i^{*(1)} + (0.63)(0.62)S_i^{*(2)})$ . This burden estimate considers  
171 movement between susceptibles due to vaccination in the absence of any resulting reduction in force  
172 of infections. The reduced burden is estimated for each model and the BMA estimate is evaluated  
173 according to the model weights.

### 174 **A.2.2 Projections Based on Vaccine Efficacy from a Recent Study**

175 Recently [7] estimated that 3 doses of vaccine had 66.7% efficacy against severe RVGE among  
176 children in Niger. Though we do not explicitly account for 3 doses of vaccine, we can calculate the  
177 effective seroconversion rate for our model above that would yield this observed efficacy after a com-  
178 plete sequence of doses. Thus, we set  $\eta^{(s)} = .667$  and use (5) to calculate the effective seroconversion  
179 rate as 49%. Then the vaccine efficacy for all RVGE is  $\eta^{(m)} = .515$ . We estimate the predicted impact  
180 of vaccination using different  $\eta^{(s)}$ ,  $\eta^{(m)}$  and  $\sigma$  values with the same dynamic equations.

181 Although we used the two dose strategy, by using different value of the efficacy, our study can  
182 account for uncertainty in the seroconversion rate. Figures 2-4 are matched to Figures 3-5 in the  
183 main paper. Because of the lower seroconversion rate, the projected results were qualitatively similar,  
184 quantitatively smaller. Vaccination causes a shift in the age distribution across models (Figure 2),  
185 with a higher proportion of RVGE cases occurring for older children.

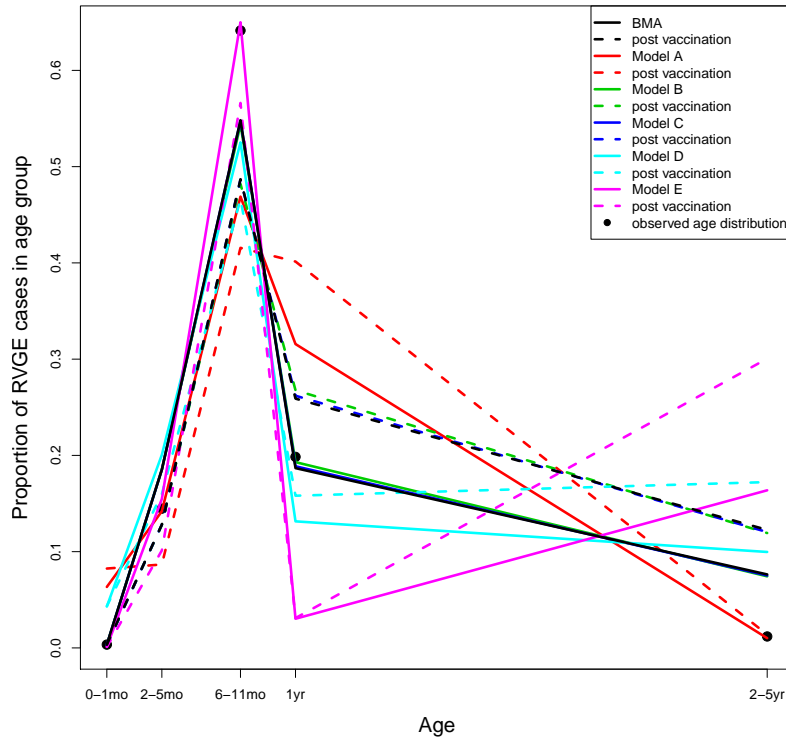

Figure 2: Distribution of cases across age groups observed in the data (black dots), predicted by the models (solid lines), and predicted 20 years after vaccination has been introduced at 70% coverage (dashed lines).

186 Over the short term, Models A-E predict an overall decline in total burden, but an increase in the  
 187 magnitude of peak incidence (Figure 3).

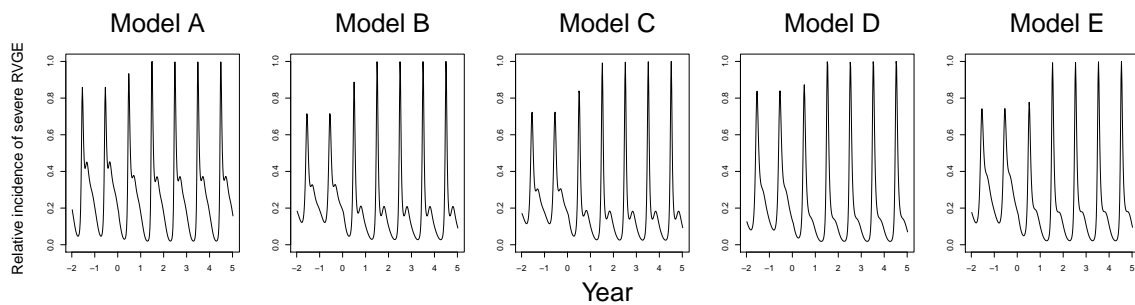

Figure 3: Relative incidence of severe RVGE after vaccination has been introduced into the models assuming 70% coverage, out to five years after vaccination has been introduced. The vaccination has been introduced at 0 year.

188 Figure 4 indicates that the short term trend of vaccination impacts based on BMA is similar to that  
 189 of Model C. BMA predicts 31.1% (indirect effect: 1.0%) of long term reduction (99%CI : (29.4%, 32.1%)).

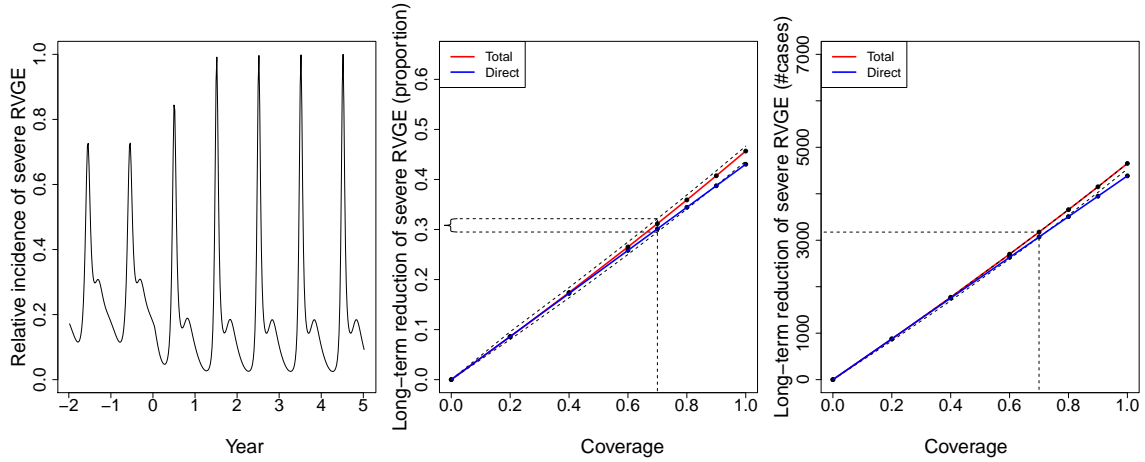

Figure 4: Relative incidence of severe RVGE (Left), percent (Middle) and absolute (Right) long term reduction in cases by coverage for Bayesian model averaging from the five fitted models. Dashed lines denote 99% confidence interval for the total effect. The vaccination has been introduced at 0 year. Variation in reduction for a fixed (70%) level of coverage is demonstrated.

## B Bayesian Model Averaging

For  $k = 1, \dots, 5$ , consider  $M_k$ , the  $k$ th model, with prior  $p(\Theta_k|M_k)$  and likelihood function  $\mathcal{L}(Y|\Theta_k, M_k)$ . Note that we take the uniform model prior for  $p(M_l)$  and model evidence  $P(Y|M_k)$  is approximated via Bayesian information criterion (BIC) as in [12]. Then the posterior model probability (PMP) for  $M_k$  given the observed data  $C$  is

$$p(M_k|Y) = \frac{p(Y|M_k)p(M_k)}{\sum_{l=1}^5 p(Y|M_l)p(M_l)},$$

where

$$p(Y|M_k) = \int \mathcal{L}(Y|\Theta_k, M_k)p(\Theta_k|M_k)d\Theta_k$$

is the model evidence for  $M_k$  which measures how well each model is supported by the observed data.

Then the BMA estimate of the burden is

$$E[\xi(t)|Y] = \sum_{l=1}^5 E[\xi_l(t)|Y, M_l]p(M_l|Y).$$

A summary of our implementation of BMA is as follows: (1) We construct a separate MCMC algorithm for each of the models A-E. (2) For each model, the burden estimate  $\xi_k(t)$  is evaluated for the MCMC samples of the posterior distribution of that model. (3) The expected burden for model  $k$ ,  $E[\xi_k(t)|Y, M_k]$ , is estimated through the sample mean of the  $\xi_k(t)$ s obtained from Step (2). (4) We take the weighted average of the burden across all models, with the weights equal to the posterior model probabilities,  $p(M_k|Y)$ , obtained above.

## References

- [1] Atchison, C., Lopman, B., and Edmunds, W. J. (2010). Modelling the seasonality of rotavirus disease and the impact of vaccination in England and Wales. *Vaccine*, 28(18):3118–3126.
- [2] Atkins, K. E., Shim, E., Pitzer, V. E., and Galvani, A. P. (2012). Impact of rotavirus vaccination on epidemiological dynamics in England and Wales. *Vaccine*, 30(3):552–564.
- [3] Bharti, N., Tatem, A. J., Ferrari, M. J., Grais, R. F., Djibo, A., and Grenfell, B. T. (2011). Explaining seasonal fluctuations of measles in Niger using nighttime lights imagery. *Science*, 334(6061):1424–1427.
- [4] de Blasio, B. F., Kasymbekova, K., and Flem, E. (2010). Dynamic model of rotavirus transmission and the impact of rotavirus vaccination in Kyrgyzstan. *Vaccine*, 28(50):7923–7932.
- [5] Dorélien, A. M. (2013). A time to be born: birth seasonality in sub-Saharan Africa. *University of Michigan Population Studies Center Research Report Series Report*, 13(785):1–61.
- [6] Hethcote, H. (1996). *Modeling heterogeneous mixing in infectious disease dynamics*. Cambridge: Cambridge University Press.
- [7] Isanaka, S., Guindo, O., Langendorf, C., Matar Seck, A., Plikaytis, B. D., Sayinzoga-Makombe, N., McNeal, M. M., Meyer, N., Adehossi, E., Djibo, A., et al. (2017). Efficacy of a low-cost, heat-stable oral rotavirus vaccine in Niger. *New England Journal of Medicine*, 376(12):1121–1130.
- [8] Lopman, B. A., Pitzer, V. E., Sarkar, R., Gladstone, B., Patel, M., Glasser, J., Gambhir, M., Atchison, C., Grenfell, B. T., Edmunds, W. J., et al. (2012). Understanding reduced rotavirus vaccine efficacy in low socio-economic settings. *PloS one*, 7(8):e41720.
- [9] Petzold, L. (1983). Automatic selection of methods for solving stiff and nonstiff systems of ordinary differential equations. *SIAM journal on scientific and statistical computing*, 4(1):136–148.
- [10] Pitzer, V. E., Atkins, K. E., de Blasio, B. F., Van Effelterre, T., Atchison, C. J., Harris, J. P., Shim, E., Galvani, A. P., Edmunds, W. J., Viboud, C., et al. (2012). Direct and indirect effects of rotavirus vaccination: comparing predictions from transmission dynamic models. *PloS one*, 7(8):e42320.
- [11] Pitzer, V. E., Viboud, C., Simonsen, L., Steiner, C., Panozzo, C. A., Alonso, W. J., Miller, M. A., Glass, R. I., Glasser, J. W., Parashar, U. D., et al. (2009). Demographic variability, vaccination, and the spatiotemporal dynamics of rotavirus epidemics. *Science*, 325(5938):290–294.

- 233 [12] Raftery, A. E. (1996). Approximate Bayes factors and accounting for model uncertainty in  
234 generalised linear models. *Biometrika*, 83(2):251–266.
- 235 [13] Shim, E., Feng, Z., Martcheva, M., and Castillo-Chavez, C. (2006). An age-structured epidemic  
236 model of rotavirus with vaccination. *Journal of mathematical biology*, 53(4):719–746.
- 237 [14] Soetaert, K., Petzoldt, T., and Setzer, R. W. (2010). Solving differential equations in R: Package  
238 *deSolve*. *Journal of Statistical Software*, 33(9):1–25.
- 239 [15] Van Effelterre, T., Soriano-Gabarro, M., Debrus, S., Claire Newbern, E., and Gray, J. (2010).  
240 A mathematical model of the indirect effects of rotavirus vaccination. *Epidemiology and infection*,  
241 138(06):884–897.
- 242 [16] Velázquez, F. R., Matson, D. O., Calva, J. J., Guerrero, M. L., Morrow, A. L., Carter-Campbell,  
243 S., Glass, R. I., Estes, M. K., Pickering, L. K., and Ruiz-Palacios, G. M. (1996). Rotavirus  
244 infection in infants as protection against subsequent infections. *New England Journal of Medicine*,  
245 335(14):1022–1028.
